# Supplementary material for: Proximal ADP-ribose Hydrolysis in Trypanosomatids is Catalyzed by a Macrodomain
Source: PubMed Central journal article supplement (PMC4827093; doi:10.1038/srep24213), 2016-04-11
Supplement: srep24213-s1.pdf [file srep24213-s1.pdf]

## Supplementary Information

### **Proximal ADP-ribose Hydrolysis in Trypanosomatids is Catalyzed by a Macrodomain**

Teemu Haikarainen<sup>1</sup>, & Lari Lehtiö<sup>1,\*</sup>

<sup>1</sup>Biocenter Oulu and Faculty of Biochemistry and Molecular Medicine, University of Oulu, FI-90014 Oulu, Finland

\*Corresponding author: Lari Lehtiö ([lari.lehtio@oulu.fi](mailto:lari.lehtio@oulu.fi))

#### **Content:**

**Supplementary Figure 1**

**Supplementary Figure 2**

**Supplementary Figure 3**

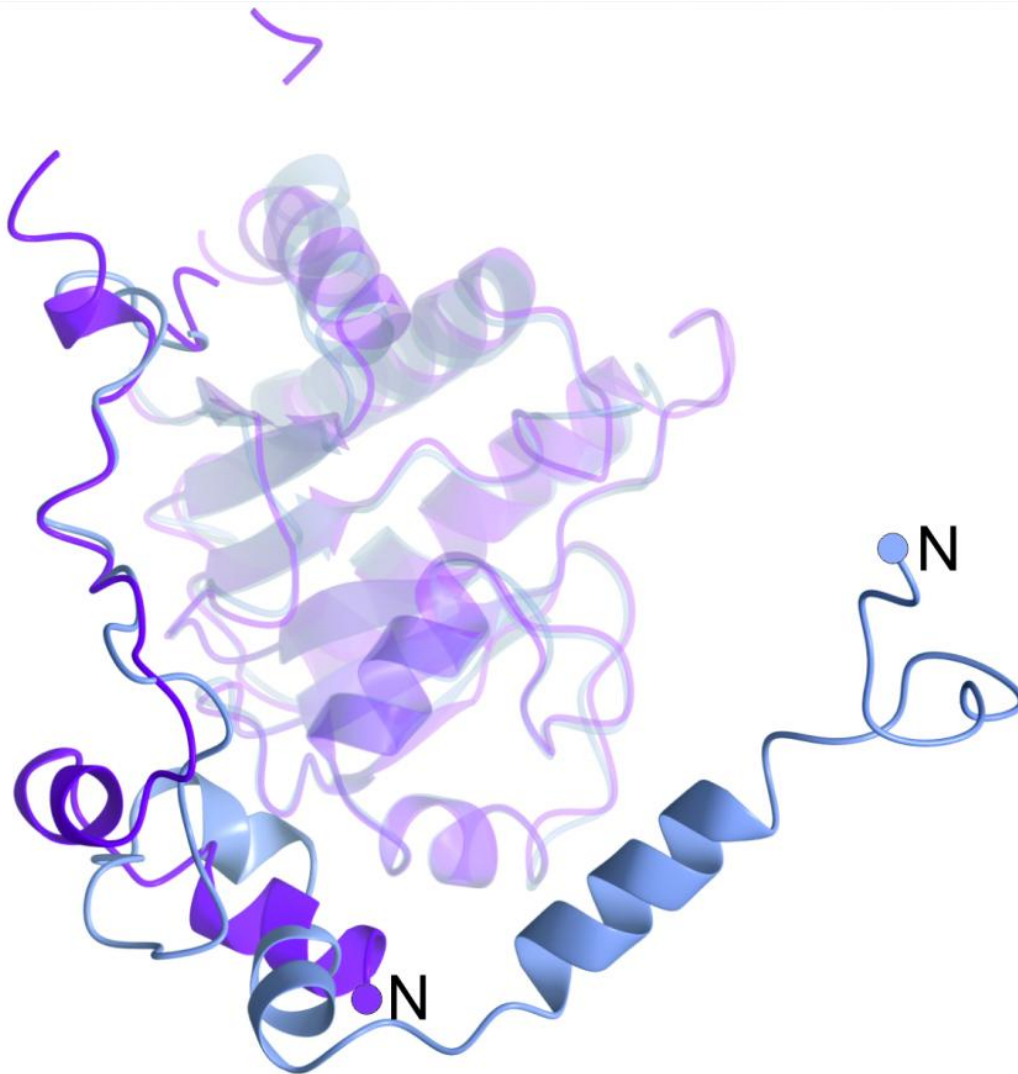

**Supplementary Figure 1.** Organization of the N-terminus of TcMDO (blue) and human MacroD2 (magenta). The N-termini of the proteins are shown in front, while the conserved macrodomain fold is shown in the background.

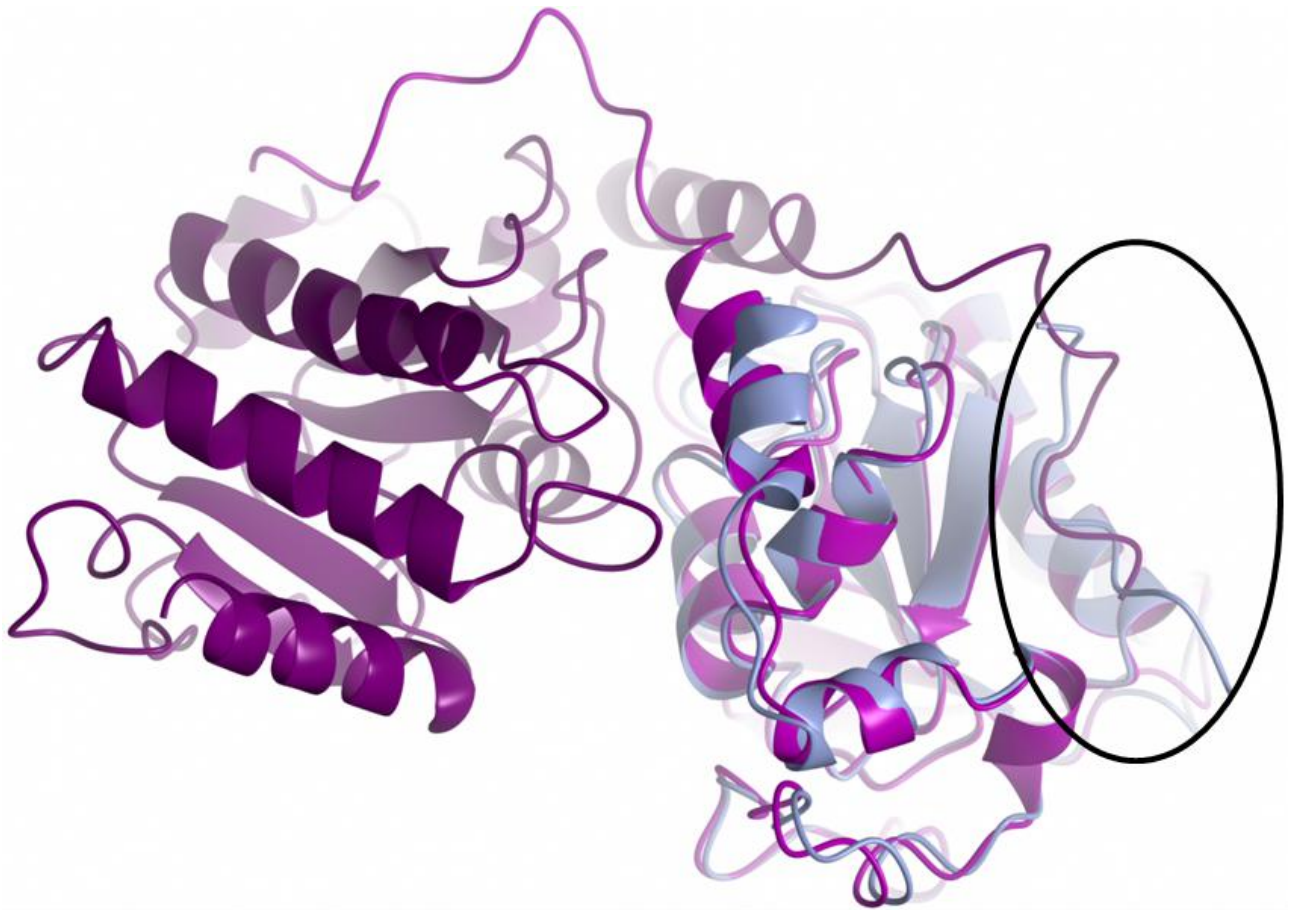

**Supplementary Figure 2.** Packing of the N-termini of the macrodomains. Superposition of TbMDO (blue) with TcMDO (magenta). N-terminus of the symmetry related TcMDO molecule (dark magenta) packs in identical location as the N-terminus of TbMDO (circled).

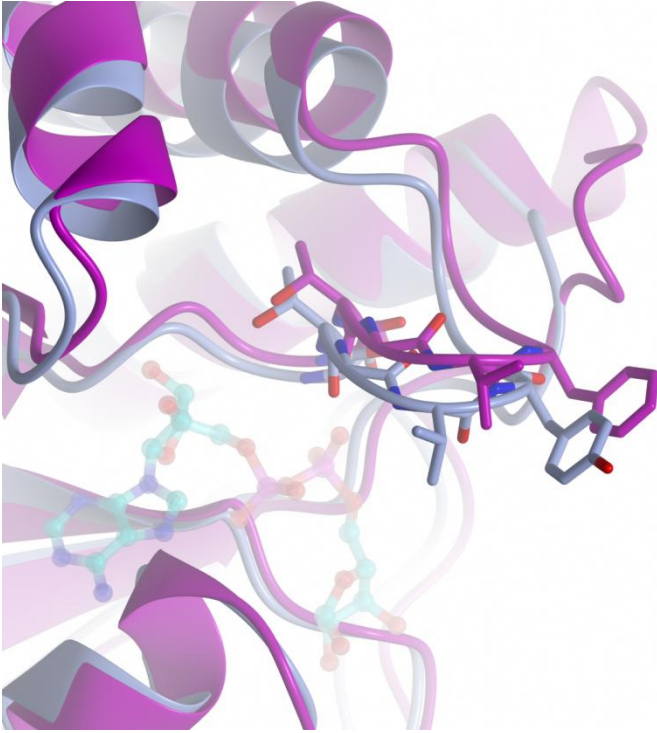

**Supplementary Figure 3.** Conformation of the loop next to distal ribose binding pocket in TcMDO. Superposition of the TcMDO (blue) and MacroD1 (magenta). ADP-ribose from the TbMDO-ADP-ribose complex is shown in the background to illustrate the binding site.
